# Supplementary material
Source: Springer Nature journal article supplement (https://www.springermedizin.de/resource/supplementary/12245_2010_60_MOESM3_ESM.pdf/9672684)

**Presentations**

2500  
2000  
1500  
1000  
500  
0

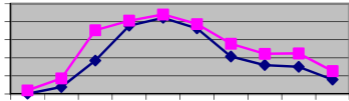

0-4 years

15-24..

35-44..

55-64..

75-84..

**Age group**

◆ Muscular

■ Other

Supplement: MOESM3 [file 9672684]
